# Supplementary material for: Polymer-composite with high dielectric constant and enhanced absorption properties based on graphene–CuS nanocomposites and polyvinylidene fluoride
Source: Royal Society of Chemistry journal article supplement (doi:10.1039/c3ta12451g), 2013-01-01
Supplement: c3ta12451g.pdf [file c3ta12451g.pdf]

## Supporting Information

### Polymer-composite with High Dielectric Constant and Enhanced Absorption Properties Based on Graphene-CuS Nanocomposites and Polyvinylidene fluoride

Xiao-Juan Zhang<sup>a</sup>, Guang-Sheng Wang<sup>a\*</sup>, Yun-Zhao Wei<sup>a</sup>, Lin Guo<sup>a</sup> and Mao-Sheng Cao<sup>b\*</sup>

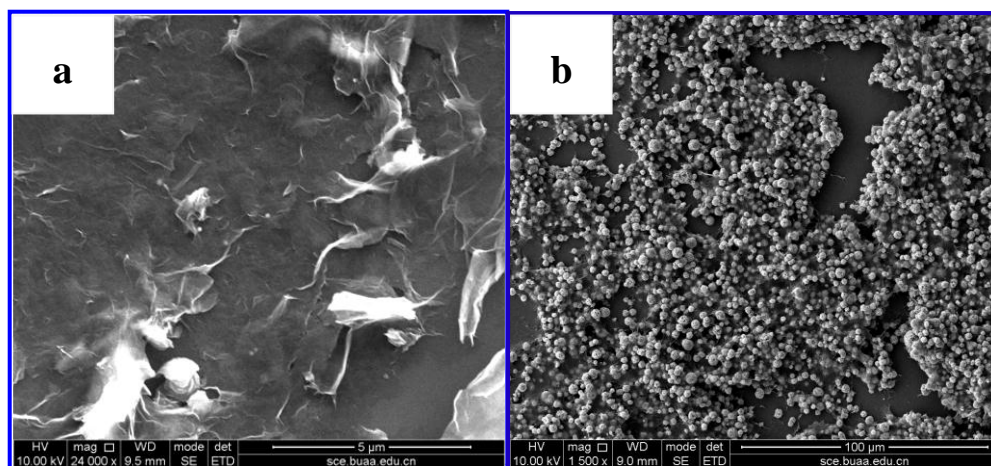

**Figure S1** SEM images of RGO synthesized in EG (a), RGO/CuS nanocomposites (b).

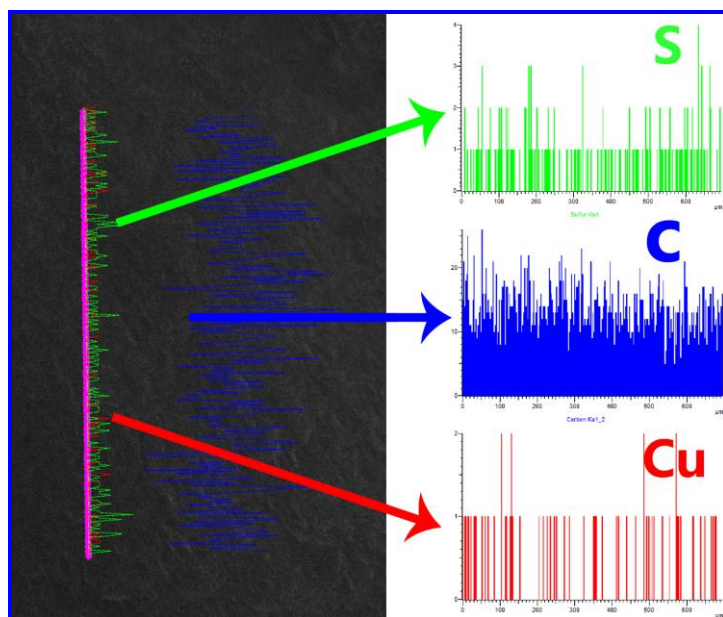

**Figure S2.** The line scan analysis of the RGO/CuS /PVDF composites.

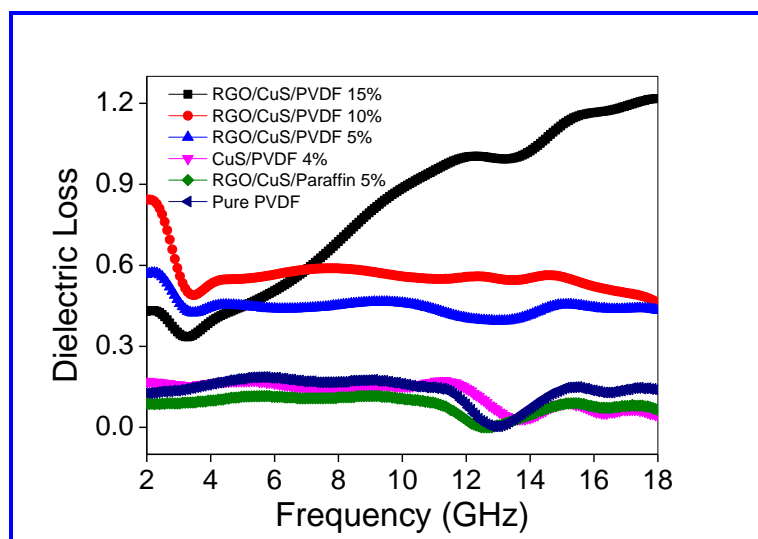

**Figure S3.** Dielectric loss of different samples.

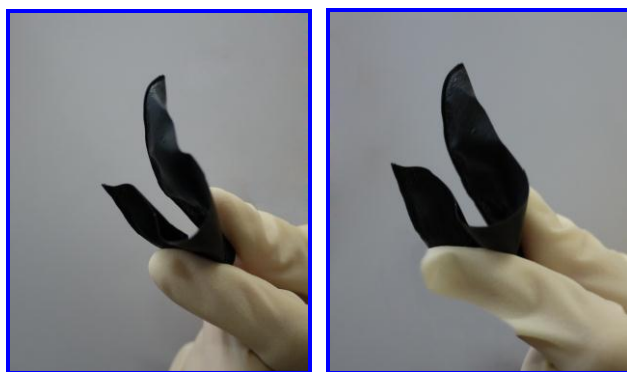

**Figure S4** The photograph of the RGO/CuS/PVDF film.
